# Supplementary material for: Straightforward N-alkylation of diketopyrrolopyrroles through the Mitsunobu reaction with benzyl, α-branched, and chiral alcohols
Source: Royal Society of Chemistry journal article supplement (doi:10.1039/d1cc02472h), 2021-01-01
Supplement: d1cc02472h1.pdf [file d1cc02472h1.pdf]

# Straightforward N-alkylation of diketopyrrolopyrroles through Mitsunobu reaction with benzyl, $\alpha$ -branched, and chiral alcohols

Maurizio Mastropasqua Talamo,<sup>\*a</sup> Flavia Pop<sup>\*a</sup> and Narcis Avarvari<sup>a</sup>

<sup>a</sup> *Univ Angers, CNRS, MOLTECH-Anjou, SFR MATRIX, F-49000 Angers, France. E-mail: [maurizio.mastropasquatalamo@univ-angers.fr](mailto:maurizio.mastropasquatalamo@univ-angers.fr); [flavia.pop@univ-angers.fr](mailto:flavia.pop@univ-angers.fr)*

## Table of contents

|                                                                                                                                            |    |
|--------------------------------------------------------------------------------------------------------------------------------------------|----|
| Straightforward N-alkylation of diketopyrrolopyrroles through Mitsunobu reaction with benzyl, $\alpha$ -branched, and chiral alcohols..... | 1  |
| <b>General methods and materials</b> .....                                                                                                 | 1  |
| <b>Synthesis and characterization</b> .....                                                                                                | 2  |
| <b>TDPP-1</b> .....                                                                                                                        | 3  |
| <b>TDPP-2</b> .....                                                                                                                        | 4  |
| <b>TDPP-3</b> .....                                                                                                                        | 5  |
| <b>TDPP-5</b> .....                                                                                                                        | 6  |
| <b>PDPP-1</b> .....                                                                                                                        | 7  |
| <b>PyDPP-4</b> .....                                                                                                                       | 8  |
| <b>Mechanism of Mitsunobu reaction</b> .....                                                                                               | 9  |
| <b>X-ray crystallography</b> .....                                                                                                         | 9  |
| <b>Circular dichroism</b> .....                                                                                                            | 12 |

## General methods and materials

All commercially available reagents and solvents were used as received unless otherwise noted. Dry tetrahydrofuran was directly used from the purification machines. Chloroform as solvent for synthesis was distilled over calcium hydride prior to use. **TDPP** (3,6-di(thiophen-2-yl)-2,5-dihydropyrrolo[3,4-c]pyrrole-1,4-dione)<sup>1</sup>, **PDPP** (3,6-bis(4-bromophenyl)-2,5-dihydropyrrolo[3,4-c]pyrrole-1,4-dione)<sup>2</sup> and **PyDPP** (3,6-di(pyridin-2-yl)-2,5-dihydropyrrolo[3,4-c]pyrrole-1,4-dione)<sup>3</sup> were synthesized according to previously reported procedures. Chromatography purifications were performed on silica gel Sorbent Technologies Silica Gel (60 Å, 65 x 250 mesh) and thin layer chromatography (TLC) was carried out using aluminum sheets precoated with silica gel 60 (EMD 40–60 mm, 230–400 mesh with 254 nm dye). All reactions were carried out in Schlenk tubes under argon atmosphere. Dropwise additions were

done with a programmable syringe pump. NMR spectra were acquired on a Bruker Avance DRX 300 and 500 spectrometers operating at 300 and 500 MHz for  $^1\text{H}$  and 75 and 125 MHz for  $^{13}\text{C}$ , respectively, at room temperature in  $\text{CDCl}_3$  solutions.  $^1\text{H}$  and  $^{13}\text{C}$  NMR spectra were referenced to the residual protonated solvent ( $^1\text{H}$ ) or the solvent itself ( $^{13}\text{C}$ ). All chemical shifts are expressed in parts per million (ppm) downfield from external tetramethylsilane (TMS), using the solvent residual signal as an internal standard and the coupling constant values (J) are reported in Hertz (Hz). The following abbreviations have been used: s, singlet; dd, doublet of doublets; m, multiplet. Mass spectrometry MALDI–TOF MS spectra were recorded on Bruker Biflex-III™ apparatus, equipped with a 337-nm N2 laser.

Details about data collection and solution refinement are given in Table S1. Single crystals of the compounds were mounted on glass fibre loops using a viscous hydrocarbon oil to coat the crystal and then transferred directly to cold nitrogen stream for data collection. X-ray data collection were performed at 150 K on an Agilent Supernova with  $\text{CuK}\alpha$  ( $\lambda = 1.54184 \text{ \AA}$ ). The structures were solved by direct methods with the SHELXS-97 and SIR92 programs and refined against all  $F^2$  values with the SHELXL-97 program<sup>1</sup> using the WinGX graphical user interface.<sup>2</sup> All non-H atoms were refined anisotropically. Hydrogen atoms were introduced at calculated positions (riding model), included in structure factor calculations but not refined. Crystallographic data for the two structures obtained at 150 K have been deposited with the Cambridge Crystallographic Data Centre, deposition numbers CCDC 2056004 (**TDPP-2-NN**), CCDC 2082406 (**PyDPP-4-NN**) and CCDC 2056005 (**(rac)-TDPP-5-NN**). These data can be obtained free of charge from CCDC, 12 Union road, Cambridge CB2 1EZ, UK (e-mail: deposit@ccdc.cam.ac.uk or <http://www.ccdc.cam.ac.uk>).

## Synthesis and characterization

Under argon atmosphere, tributylphosphine (394  $\mu\text{L}$ , 1.60 mmol) was dissolved in dry THF (6 mL) and the mixture cooled at 0 °C, then DIAD (314  $\mu\text{L}$ , 1.60 mmol) was added dropwise, resulting in a rapid loss of DIAD's bright yellow tint upon formation of a complex with the phosphine. In a separate Schlenk tube, under argon atmosphere, **ArDPP** (0.32 mmol) was dispersed in dry THF (6 mL) and the mixture cooled at 0 °C. The mixture containing the  $\text{Bu}_3\text{P}/\text{DIAD}$  complex was added dropwise into the second Schlenk tube resulting in a bright purple solution. At this point, R-OH (1.60 mmol) dissolved in THF (1 mL) was injected dropwise to the mixture over 2h. The mixture was then allowed to reach r.t. and kept under stirring overnight.

The mixture was quenched with a splash of water, concentrated under vacuum, diluted into  $\text{CH}_2\text{Cl}_2$ , filtered through a PTFE membrane to collect the insoluble unreacted **ArDPP**. The filtrate was washed with 1M HCl, then water, the organic layer was dried over  $\text{MgSO}_4$  and the solvent removed under reduced pressure.

The compound was purified by column chromatography on silica gel with mixtures of AcOEt/DCM/PE as the elution system.

Note: Due to several factors (contamination of the products with alkylated and/or reduced DIAD by-products, close RF values between O-alkylated and N-alkylated derivatives, waxy consistency of the O-alkylated derivatives precluding reprecipitation) in some cases the purification of O-alkylated derivatives was not accomplished, therefore the characterization of such products was not achieved.

## TDPP-1

Following the general procedure, from 96 mg of TDPP and 194  $\mu\text{L}$  of *rac*-1-phenylethanol, 14 mg of solid TDPP were recovered (85% conversion). After column chromatography (eluent polarity gradient from DCM:PE = 3:7, to DCM 100%, to AcOEt:DCM = 2:98), and subsequent reprecipitation in MeCN, **TDPP-1-N** (57 mg, 52% yield on reacted substrate) and **TDPP-1-NN** (64 mg, 46% yield on reacted substrate) were obtained as bright red solids.

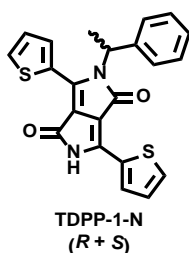

$^1\text{H}$  NMR (499 MHz, 50  $^\circ\text{C}$ ,  $\text{CDCl}_3$ )  $\delta$  = 8.33 (dd,  $J$  = 3.8, 0.8 Hz, 1H), 8.13 (d,  $J$  = 3.3 Hz, 1H), 7.93 (s, 1H), 7.57 (d,  $J$  = 5.0 Hz, 2H), 7.39 (d,  $J$  = 7.5 Hz, 2H), 7.37 – 7.33 (m, 2H), 7.28 – 7.24 (m, 1H), 7.20 (dd,  $J$  = 4.9, 4.0 Hz, 2H), 5.87 (q,  $J$  = 7.2 Hz, 1H), 2.01 (d,  $J$  = 7.1 Hz, 3H) ppm.

$^{13}\text{C}$  NMR (126 MHz,  $\text{CDCl}_3$ )  $\delta$  = 161.94, 141.18, 140.94, 136.80, 133.99, 132.74, 130.86, 130.79, 130.65, 129.47, 129.44, 128.75, 128.46, 127.41, 126.63, 109.16, 53.77, 29.87, 18.57 ppm.

HRMS: calcd for  $[\text{C}_{22}\text{H}_{15}\text{N}_2\text{O}_2\text{S}_2]^-$  = 403.0693 , found = 403.05804

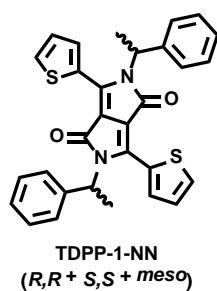

$^1\text{H}$  NMR (499 MHz, 50  $^\circ\text{C}$ ,  $\text{CDCl}_3$ )  $\delta$  = 8.13 (dd,  $J$  = 3.8, 1.0 Hz, 2H), 7.53 (dd,  $J$  = 5.0, 1.0 Hz, 2H), 7.39 (d,  $J$  = 7.3 Hz, 4H), 7.36 – 7.32 (m, 4H), 7.26 – 7.23 (m, 2H), 7.15 (dd,  $J$  = 5.0, 3.9 Hz, 2H), 5.84 (qd,  $J$  = 7.1, 4.3 Hz, 2H), 1.98 (dd,  $J$  = 7.1, 2.3 Hz, 6H) ppm.

$^{13}\text{C}$  NMR (126 MHz, 50  $^\circ\text{C}$ ,  $\text{CDCl}_3$ )  $\delta$  = 162.09, 141.29, 141.28, 141.26, 141.23, 134.19, 134.15, 130.75, 130.73, 129.38, 128.68, 128.41, 128.40, 127.34, 127.32, 126.74, 126.70, 109.93, 109.90, 53.73, 53.62, 29.87, 18.59, 18.52, 18.45 ppm.

HRMS: calcd for  $\text{C}_{30}\text{H}_{24}\text{N}_2\text{O}_2\text{S}_2$  = 508.1279 , found = 508.1284

## TDPP-2

Following the general procedure, from 96 mg of TDPP and 214 mg of *rac*-1-indanol, any traces of solid starting material TDPP did not remain in the mixture (100% conversion). After column chromatography (polarity gradient from DCM:PE = 3:7, to DCM 100%, to AcOEt:DCM = 2:98), and subsequent reprecipitation in MeCN, **TDPP-2-N** (32 mg, 24% yield) and **TDPP-2-NN** (124 mg, 73% yield on reacted substrate) were obtained as bright red solids.

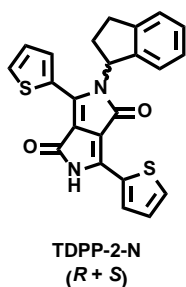

---

$^1\text{H}$  NMR (499 MHz, 50 °C,  $\text{CDCl}_3$ )  $\delta$  = 8.23 (d,  $J$  = 3.7 Hz, 1H), 8.16 (s, 1H), 7.68 (s, 1H), 7.49 (d,  $J$  = 4.6 Hz, 1H), 7.47 (d,  $J$  = 5.0 Hz, 1H), 7.22 – 7.08 (m, 5H), 6.17 – 6.11 (m, 1H), 3.23 – 3.15 (m, 1H), 2.96 – 2.88 (m, 1H), 2.67 – 2.59 (m, 1H), 2.51 (dtd,  $J$  = 12.4, 8.9, 3.2 Hz, 1H) ppm.

$^{13}\text{C}$  NMR (126 MHz, 50 °C,  $\text{CDCl}_3$ )  $\delta$  = 161.53, 143.30, 141.61, 141.14, 136.66, 134.19, 132.82, 130.89, 130.64, 130.58, 129.55, 129.48, 128.51, 128.12, 126.85, 125.24, 123.39, 109.17, 53.49, 30.89, 30.43, 29.86 ppm.

HRMS: calcd for  $[\text{C}_{23}\text{H}_{15}\text{N}_2\text{O}_2\text{S}_2]^-$  = 416.0583, found = 415.0580

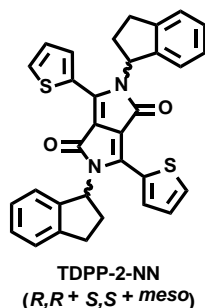

---

$^1\text{H}$  NMR (499 MHz, 50 °C,  $\text{CDCl}_3$ )  $\delta$  = 8.21 (s, 2H), 7.51 (d,  $J$  = 4.8 Hz, 2H), 7.28 – 7.11 (m, 10H), 3.29 – 3.20 (m, 2H), 3.02 – 2.94 (m, 2H), 2.70 (td,  $J$  = 21.8, 9.6 Hz, 2H), 2.55 (dtt,  $J$  = 12.1, 8.9, 3.0 Hz, 2H) ppm.

$^{13}\text{C}$  NMR (126 MHz, 50 °C,  $\text{CDCl}_3$ )  $\delta$  = 161.69, 161.67, 143.25, 141.77, 141.66, 141.43, 141.41, 134.39, 134.33, 130.73, 130.67, 129.45, 129.43, 128.44, 128.02, 128.00, 126.78, 126.78, 125.20, 125.19, 123.39, 123.38, 109.75, 109.73, 60.07, 30.87, 30.86, 30.33, 29.86 ppm.

HRMS: calcd for  $[\text{C}_{32}\text{H}_{23}\text{N}_2\text{O}_2\text{S}_2]^-$  = 531.1213, found = 531.1206

---

### TDPP-3

Following the general procedure, from 96 mg of TDPP and 166  $\mu$ L of benzyl alcohol, 46 mg of solid TDPP were recovered (52% conversion). After column chromatography (polarity gradient from DCM:PE = 3:7, to DCM 100%, to AcOEt:DCM = 2:98), and subsequent reprecipitation in MeCN, **TDPP-3-N** (19 mg, 30% yield on reacted substrate) and **TDPP-3-NN** (52 mg, 65% yield on reacted substrate) were obtained as dark red solids.

---

$^1\text{H}$  NMR (300 MHz,  $\text{CDCl}_3$ )  $\delta$  = 8.60 (s, 1H), 8.39 (s, 1H), 8.02 (s, 1H), 7.63 (d,  $J$  = 5.5 Hz, 1H), 7.56 (d,  $J$  = 5.0 Hz, 1H), 7.38 – 7.27 (m, 6H), 5.36 (s,  $J$  = 6.4 Hz, 2H) ppm.

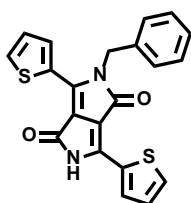

TDPP-3-N

$^{13}\text{C}$  NMR not available due to poor solubility in common deuterated solvents.

HRMS: calcd for  $[\text{C}_{21}\text{H}_{13}\text{N}_2\text{O}_2\text{S}_2]^-$  = 389.0437, found = 389.0424

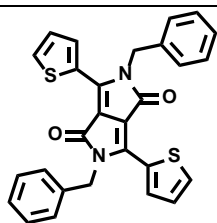

TDPP-3-NN

---

The spectrometric data match those previously reported in literature for this compound.<sup>1</sup>

---

## TDPP-5

Following the general procedure, from 96 mg of TDPP and 173  $\mu$ L of *rac*-2-methyl-butanol, 48 mg of solid TDPP were recovered (50% conversion). After column chromatography (polarity gradient from DCM:PE = 3:7, to DCM 100%, to AcOEt:DCM = 2:98), **TDPP-5-O** (14 mg, 24% yield on reacted substrate), **TDPP-5-N** (13.6 mg, 23% yield on reacted substrate), a mixture of **TDPP-5-OO/TDPP-5-ON** (25 mg, 35% yield on reacted substrate) and **TDPP-5-NN** (8.5 mg, 12% yield on reacted substrate) were obtained as dark purple solids.

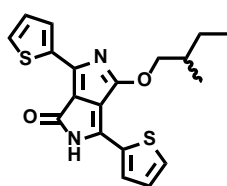

TDPP-5-O  
(*R* + *S*)

$^1\text{H}$  NMR (300 MHz,  $\text{CDCl}_3$ )  $\delta$  = 8.99 (s, 2H), 8.44 (d,  $J$  = 2.9 Hz, 2H), 8.03 (d,  $J$  = 3.5 Hz, 2H), 7.69 (d,  $J$  = 4.5 Hz, 2H), 7.53 (dd,  $J$  = 5.0, 1.0 Hz, 2H), 7.27 – 7.24 (m, 2H), 7.22 (dd,  $J$  = 5.0, 3.8 Hz, 2H), 5.37 (d,  $J$  = 5.1 Hz, 2H), 1.98 – 1.75 (m, 4H), 1.50 (d,  $J$  = 6.2 Hz, 6H), 1.06 (t,  $J$  = 7.5 Hz, 6H) ppm.

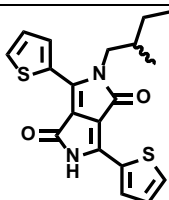

TDPP-5-N  
(*R* + *S*)

The spectrometric data match those previously reported in literature for this compound.<sup>4</sup>

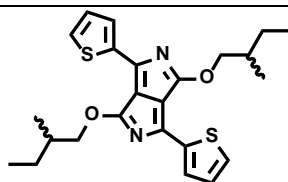

TDPP-5-OO  
(*R,R* + *S,S* + *meso*)

$^1\text{H}$  NMR (300 MHz,  $\text{CDCl}_3$ )  $\delta$  = 8.03 (d,  $J$  = 3.6 Hz, 2H), 7.54 (d,  $J$  = 5.1 Hz, 2H), 7.19 (dd,  $J$  = 4.9, 3.9 Hz, 2H), 5.33 (dd,  $J$  = 12.4, 6.1 Hz, 4H), 1.91 – 1.75 (m, 6H), 1.47 (d,  $J$  = 6.2 Hz, 6H), 1.04 (t,  $J$  = 7.4 Hz, 6H). ppm.

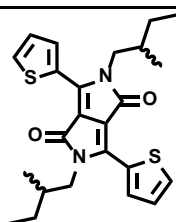

TDPP-5-NN  
(*R,R* + *S,S* + *meso*)

The spectrometric data match those previously reported in literature for this compound.<sup>5</sup>

## PDPP-1

Following the general procedure, from 96 mg of PDPP and 194  $\mu\text{L}$  of (*S*)-1-phenylethanol, 22 mg of solid PDPP were recovered (77% conversion). After column chromatography (eluent polarity gradient from DCM:PE = 1:9, to DCM 100%, to AcOEt:DCM = 2:98), **PDPP-1-N** (19 mg, 14% yield on reacted substrate) and **PDPP-1-NN** (74 mg, 46% yield on reacted substrate) were obtained as bright orange solids.

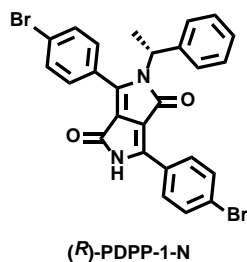

$^1\text{H}$  NMR (300 MHz,  $\text{CDCl}_3$ )  $\delta$  = 9.70 (s, 1H), 8.15 (d,  $J$  = 8.7 Hz, 2H), 7.61 (dd,  $J$  = 12.9, 8.6 Hz, 4H), 7.49 (d,  $J$  = 8.6 Hz, 2H), 7.39 – 7.27 (m, 5H), 5.38 (q,  $J$  = 7.0 Hz, 1H), 1.92 (d,  $J$  = 7.2 Hz, 3H).

$^{13}\text{C}$  NMR (76 MHz,  $\text{CDCl}_3$ )  $\delta$  = 163.22, 162.66, 148.21, 144.24, 141.02, 132.63, 132.33, 130.68, 129.47, 128.88, 127.61, 127.10, 126.89, 126.44, 126.41, 126.13, 111.92, 110.27, 53.69, 18.74 ppm.

HRMS: calcd for  $[\text{C}_{26}\text{H}_{17}\text{Br}_2\text{N}_2\text{O}_2]^-$  = 546.9675 , found = 546.9662

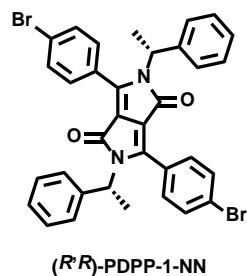

$^1\text{H}$  NMR (300 MHz,  $\text{CDCl}_3$ )  $\delta$  = 7.60 – 7.54 (m, 4H), 7.47 – 7.42 (m, 4H), 7.36 – 7.27 (m, 10H), 5.30 (q,  $J$  = 7.0 Hz, 2H), 1.85 (d,  $J$  = 7.2 Hz, 6H) ppm.

$^{13}\text{C}$  NMR (76 MHz,  $\text{CDCl}_3$ )  $\delta$  = 162.67, 148.52, 141.13, 132.26, 130.60, 128.73, 127.49, 126.96, 126.60, 125.93, 110.84, 53.56, 13.71 ppm.

HRMS: calcd for  $\text{C}_{34}\text{H}_{26}\text{Br}_2\text{N}_2\text{O}_2$  = 652.0345 , found = 652.0356

## PyDPP-4

Following the general procedure, from 50 mg of PyDPP and 194  $\mu$ L of (*S*)-1-phenylethanol, 30 mg of solid PDPP were recovered (40% conversion). After column chromatography (eluent polarity gradient from DCM:PE = 1:9, to DCM 100%), **PyDPP-4-N** (20 mg, 70% yield on reacted substrate) was obtained as a bright orange solid.

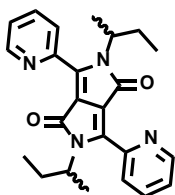

PyDPP-4-NN  
(*R,R*+ *S,S*+ *meso*)

---

$^1\text{H}$  NMR (300 MHz,  $\text{CDCl}_3$ )  $\delta$  = 8.72 (ddd,  $J$  = 4.7, 1.6, 0.7 Hz, 2H), 8.49 (dd,  $J$  = 8.0, 0.7 Hz, 2H), 7.89 (td,  $J$  = 7.8, 1.8 Hz, 2H), 7.34 (ddd,  $J$  = 7.6, 4.8, 1.1 Hz, 2H), 4.92 – 4.78 (m, 2H), 2.30 – 2.12 (m, 2H), 1.84 – 1.67 (m, 2H), 1.56 (dd,  $J$  = 6.8, 4.4 Hz, 6H), 0.84 (td,  $J$  = 7.4, 3.5 Hz, 6H) ppm.

$^{13}\text{C}$  NMR (76 MHz,  $\text{CDCl}_3$ )  $\delta$  = 163.13, 163.11, 149.27, 147.86, 147.85, 147.55, 147.45, 136.99, 127.41, 127.39, 124.79, 111.59, 111.55, 54.09, 54.04, 27.29, 18.91, 11.72, 11.67 ppm.

HRMS: calcd for  $\text{C}_{24}\text{H}_{26}\text{N}_4\text{O}_2$  = 402.2056 , found = 402.2052

---



## Mechanism of Mitsunobu reaction

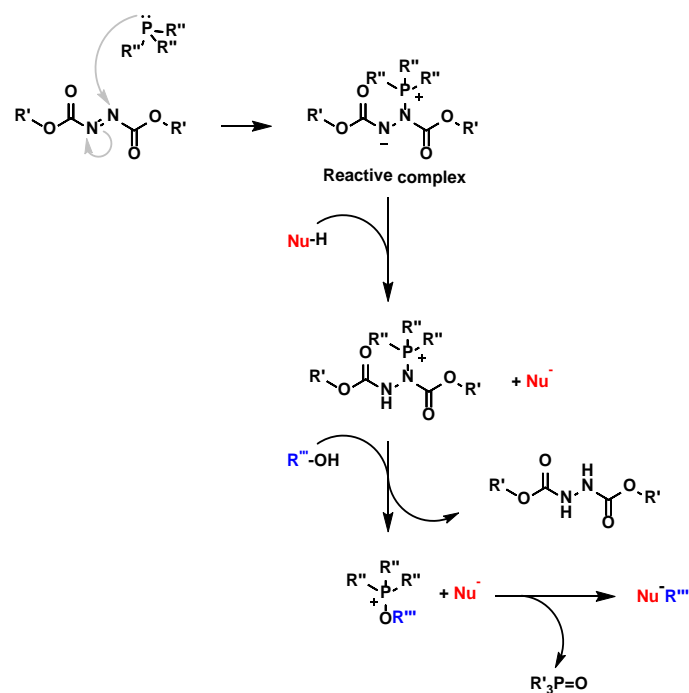

**Scheme S1** Simplified mechanism of the Mitsunobu reaction.

## X-ray crystallography

Red, bright prismatic single crystals of racemic of **TDPP-5-NN** ( $i=5$ ) have been obtained by evaporation from chloroform solution. Compound **TDPP-5-NN** ( $i=5$ ) crystallized in the monoclinic system, centrosymmetric space group  $P2_1/n$  with half of independent molecule in the asymmetric unit (Figure S1).

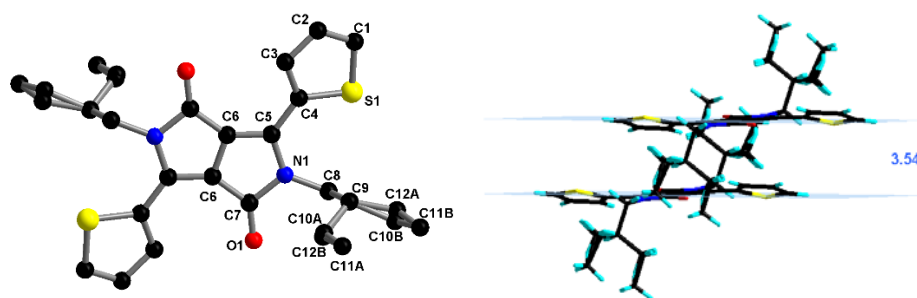

**Fig. S1** View of the molecular structure with atom labels (left; hydrogen atoms have been omitted for clarity) and side view of the crystal packing together with the plane to plane distance given in Å (right) of TDPP-5-NN ( $i=5$ ).

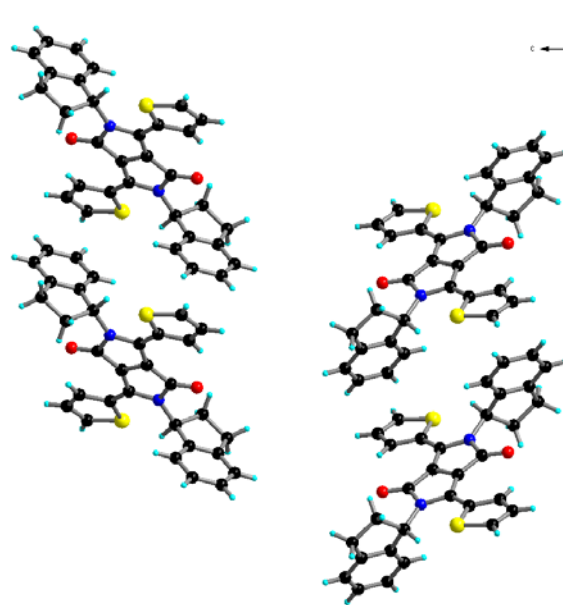

**Fig. S2** Molecular packing of TDPP-2-NN ( $i=2$ ) in the  $bc$  plane.

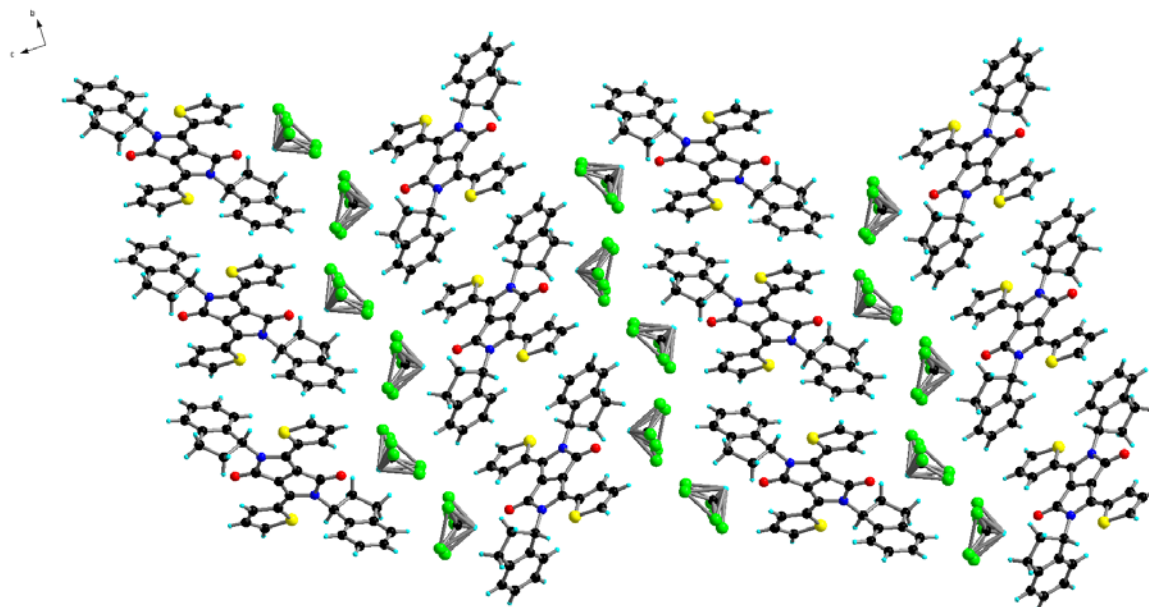

**Fig. S3** Molecular packing of TDPP-2-NN ( $i=2$ ) in the  $bc$  plane, showing a layer packing separated by solvent molecules.

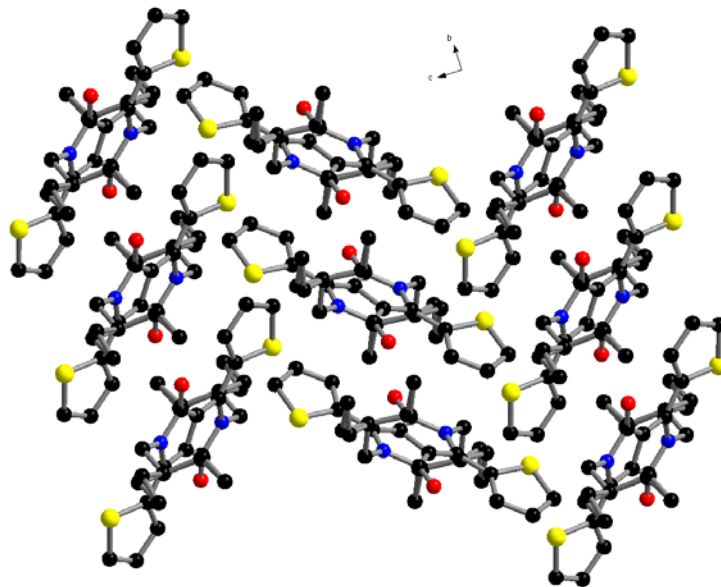

**Fig. S4** Molecular packing of **TDPP-5-NN** (i=5, racemic) in the *bc* plane, showing the edge-to-face disposition of the molecules between the parallel layers.

**Table S1** Detailed crystallographic data.

|                                                                                                                   | TDPP-2-NN (i=2,<br>racemic)                                                                  | PyDPP-4-NN<br>(i=4, racemic)                                  | TDPP-5-NN<br>(i=5, racemic)                                                  | TDPP-5-NN<br>(i=5, <i>S,S</i> ) (ref.14)                                     |
|-------------------------------------------------------------------------------------------------------------------|----------------------------------------------------------------------------------------------|---------------------------------------------------------------|------------------------------------------------------------------------------|------------------------------------------------------------------------------|
| Chemical formula                                                                                                  | C <sub>34</sub> H <sub>26</sub> Cl <sub>6</sub> N <sub>2</sub> O <sub>2</sub> S <sub>2</sub> | C <sub>24</sub> H <sub>26</sub> N <sub>4</sub> O <sub>2</sub> | C <sub>24</sub> H <sub>28</sub> N <sub>2</sub> O <sub>2</sub> S <sub>2</sub> | C <sub>24</sub> H <sub>28</sub> N <sub>2</sub> O <sub>2</sub> S <sub>2</sub> |
| <i>M<sub>r</sub></i>                                                                                              | 771.39                                                                                       | 402.49                                                        | 440.60                                                                       | 440.60                                                                       |
| Crystal system,<br>space group                                                                                    | Monoclinic, <i>P2<sub>1</sub>/n</i>                                                          | Monoclinic, <i>P2<sub>1</sub>/n</i>                           | Monoclinic, <i>P2<sub>1</sub>/c</i>                                          | Monoclinic, <i>P2<sub>1</sub></i>                                            |
| Temperature (K)                                                                                                   | 150.0 (1)                                                                                    | 200.4(6)                                                      | 150.0 (1)                                                                    | 120                                                                          |
| <i>a</i> , <i>b</i> , <i>c</i> (Å)                                                                                | 6.5241 (2), 9.3333<br>(3), 27.7177 (9)                                                       | 11.5078(9),<br>5.6097(4),<br>16.8043(11)                      | 13.0653 (11),<br>5.5363 (3),<br>16.2264 (10)                                 | 16.0248 (4),<br>5.61472 (12),<br>25.7171 (6)                                 |
| β (°)                                                                                                             | 90.516 (3)                                                                                   | 106.234(8)                                                    | 109.093 (8)                                                                  | 106.106 (3)                                                                  |
| <i>V</i> (Å <sup>3</sup> )                                                                                        | 1687.70 (9)                                                                                  | 1041.55(14)                                                   | 1109.14 (14)                                                                 | 2223.07 (10)                                                                 |
| <i>Z</i>                                                                                                          | 2                                                                                            | 2                                                             | 2                                                                            | 4                                                                            |
| ρ <sub>calc</sub> (g·cm <sup>-3</sup> )                                                                           | 1.518                                                                                        | 1.283                                                         | 1.319                                                                        | Cu Kα                                                                        |
| μ (Cu Kα) (mm <sup>-1</sup> )                                                                                     | 6.092                                                                                        | 0.667                                                         | 2.357                                                                        | 2.35                                                                         |
| No. of measured,<br>independent and<br>observed [ <i>I</i> ><br>2σ( <i>I</i> )] reflections                       | 7224, 3435, 3050                                                                             | 4206, 2096, 1789                                              | 4034, 2123, 1807                                                             | 24225, 8553, 7909                                                            |
| <i>R</i> <sub>int</sub>                                                                                           | 0.0279                                                                                       | 0.0204                                                        | 0.0227                                                                       | 0.034                                                                        |
| <i>R</i> [ <i>F</i> <sup>2</sup> > 2σ( <i>F</i> <sup>2</sup> )],<br><i>wR</i> ( <i>F</i> <sup>2</sup> ), <i>S</i> | 0.0439, 0.1180,<br>1.042                                                                     | 0.0548, 0.1430,<br>1.074                                      | 0.0455, 0.1312,<br>1.050                                                     | 0.036, 0.099, 1.05                                                           |
| CCDC number                                                                                                       | 2056004                                                                                      | 2082406                                                       | 2056005                                                                      |                                                                              |

**Table S2** Measured values (Å) of the aryl•••lactam centroids, inter-planar distances and overall plane to plane shift (ArDPP-ArDPP) together with dihedral angles (°) between the planes of DPP and the adjacent aryl groups (DPP-Ar) and the planes of lactam unit and C<sub>Lactam</sub>-N-C(R) of the substituent.

| TDPP                                      | Ar•••lactam centroids (Å)      | Inter-planar distance (Å) | ArDPP plane to plane shift (Å) | DPP-Ar (°)                               | Lactam-[C <sub>Lactam</sub> -N-C(R)] (°) |
|-------------------------------------------|--------------------------------|---------------------------|--------------------------------|------------------------------------------|------------------------------------------|
| TDPP-2-NN (i=2, racemic)                  | 3.82                           | 4.01                      | 5.39                           | 13.85                                    | 7.46                                     |
| TDPP-5-NN (i=5, racemic)                  | 3.77                           | 3.54                      | 4.44                           | 17.96                                    | 4.23                                     |
| TDPP-5-NN (i=5, <i>S,S</i> ) <sup>6</sup> | a: 3.69; 3.74<br>b: 3.69; 3.72 | a: 3.58<br>b: 3.35        | a: 4.54<br>b: 4.49             | a: 18.24 and 14.57<br>b: 20.70 and 16.84 | a: 3.43 and 4.35<br>b: 3.98 and 4.39     |
| Py-DPP-4-NN (i=4, racemic)                | -                              | 3.98                      | 4.10                           | 34.21                                    |                                          |

The X-ray structure of TDPP-5-NN (i=5, *S,S*) has already been reported as (*S,S*) enantiomer.<sup>6</sup>

### Circular dichroism

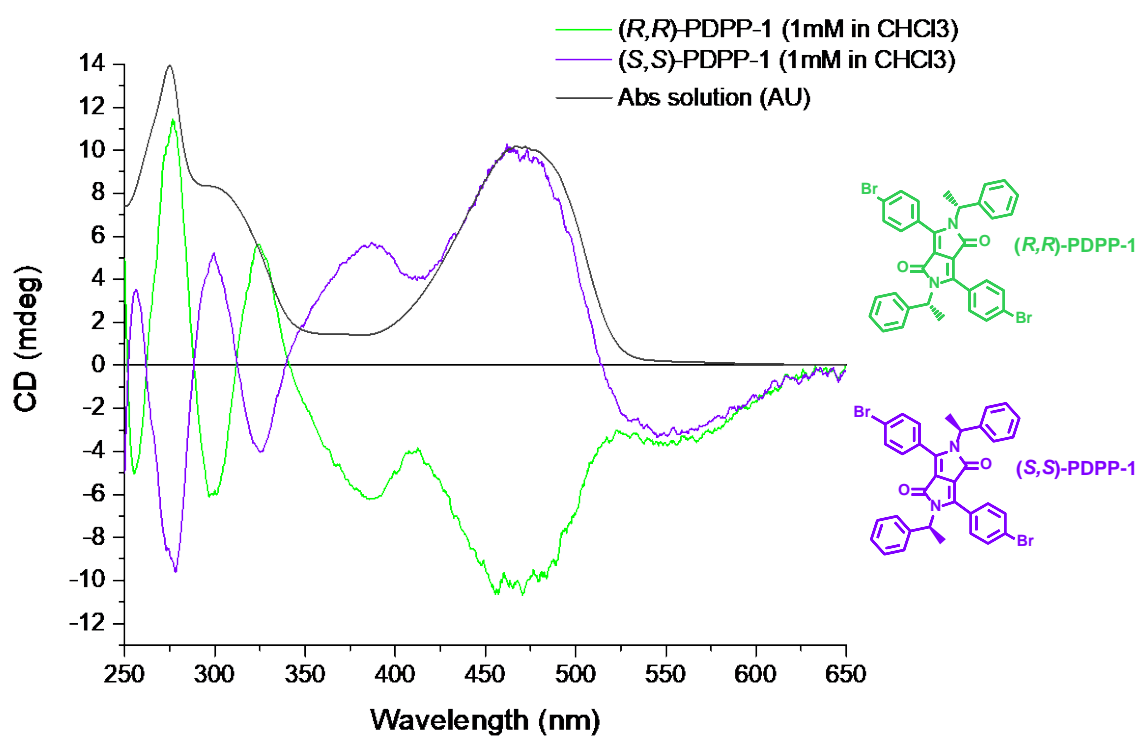

**Fig. S5** Absorption and CD spectra of PDPP-1-NN (i=1) (*S,S*) and (*R,R*) enantiomers 1mM in chloroform solutions. (*S,S*) PDPP-1-NN (i=1) has been obtained in similar conditions and yields as the (*R,R*) PDPP-1-NN (i=1) described above.

1. J. Calvo-Castro, S. Maczka, C. Thomson, G. Morris, A. R. Kennedy and C. J. McHugh, *CrystEngComm*, 2016, **18**, 9382–9390.
2. T. G. Hwang, J. Y. Kim, J. W. Namgoong, J. M. Lee, S. B. Yuk, S. H. Kim and J. P. Kim, *Photochem. Photobiol. Sci.*, 2019, **18**, 1064–1074.
3. E. H. Ghazvini Zadeh, M. V. Bondar, I. A. Mikhailov and K. D. Belfield, *J. Phys. Chem. C*, 2015, **119**, 8864–8875.
4. F. Pop, W. Lewis and D. B. Amabilino, *CrystEngComm*, 2016, **18**, 8933–8943.
5. S. Rieth, Z. Li, C. E. Hinkle, C. X. Guzman, J. J. Lee, S. I. Nehme and A. B. Braunschweig, *J. Phys. Chem. C*, 2013, **117**, 11347–11356.
6. Y. Zhou, C. X. Guzman, L. C. Helguero-Kelley, C. Liu, S. R. Peurifoy, B. Captain and A. B. Braunschweig, *J. Phys. Org. Chem.*, 2016, **29**, 689–699.
